# Supplementary material for: A case-control study of trace-element status and lung cancer in Appalachian Kentucky
Source: PubMed Central journal article supplement (PMC6392268; doi:10.1371/journal.pone.0212340), 2019-02-27
Supplement: pone.0212340.s001.pdf [file pone.0212340.s001.pdf]

**S1 Table. Full cohort demographics broken down by case versus control.**

|                                                          |                   | Case                   | Control                | All                    | p-value |
|----------------------------------------------------------|-------------------|------------------------|------------------------|------------------------|---------|
| N                                                        |                   | 150                    | 370                    | 520                    |         |
| Age                                                      |                   | 62.5 (39.0 - 89.0)     | 63.0 (26.0 - 91.0)     | 63.0 (26.0 - 91.0)     | 0.62    |
| BMI (3 mos ago)                                          |                   | 26.4 (14.6 - 55.2)     | 29.0 (15.3 - 66.6)     | 28.4 (14.6 - 66.6)     | <0.0001 |
| Created:<br>Comorbidity Score                            |                   | 2.0 (0.0 - 11.0)       | 1.0 (0.0 - 11.0)       | 1.0 (0.0 - 11.0)       | <0.0001 |
| Pred fruits/vegs incl<br>legumes & fries c/day           |                   | 2.4 (1.6 - 3.7)        | 2.6 (1.6 - 4.2)        | 2.5 (1.6 - 4.2)        | 0.01    |
| Pred fruits/vegs incl<br>legumes & no fries<br>c/day     |                   | 2.3 (1.4 - 3.5)        | 2.4 (1.4 - 4.1)        | 2.4 (1.4 - 4.1)        | 0.02    |
| Pred fruits c/day                                        |                   | 0.8 (0.4 - 2.2)        | 0.9 (0.4 - 2.0)        | 0.9 (0.4 - 2.2)        | 0.21    |
| Pred vegetables incl<br>legumes & fries c/day            |                   | 1.6 (1.1 - 2.6)        | 1.7 (1.1 - 3.1)        | 1.6 (1.1 - 3.1)        | 0.03    |
| Pred vega incl<br>legumes & no fries<br>c/day            |                   | 1.5 (1.0 - 2.5)        | 1.6 (0.9 - 3.0)        | 1.5 (0.9 - 3.0)        | 0.03    |
| Pred dairy c/day                                         |                   | 1.5 (0.9 - 3.4)        | 1.5 (0.9 - 4.3)        | 1.5 (0.9 - 4.3)        | 0.82    |
| Pred total added<br>sugars tsp/day                       |                   | 15.3 (10.0 - 36.0)     | 15.0 (10.0 - 36.8)     | 15.1 (10.0 - 36.8)     | 0.26    |
| Pred added sugars<br>from sugar-sweetened<br>bevs tsp/da |                   | 6.2 (3.6 - 21.9)       | 5.1 (3.6 - 20.9)       | 5.3 (3.6 - 21.9)       | 0.03    |
| Pred whole grains<br>oz/day                              |                   | 0.6 (0.3 - 1.8)        | 0.8 (0.3 - 1.9)        | 0.8 (0.3 - 1.9)        | 0.02    |
| Pred fiber m/day                                         |                   | 15.9 (11.1 - 25.5)     | 16.9 (10.0 - 28.5)     | 16.6 (10.0 - 28.5)     | 0.005   |
| Pred calcium mg/day                                      |                   | 900.9 (632.2 - 1483.9) | 931.0 (615.8 - 1797.5) | 921.3 (615.8 - 1797.5) | 0.09    |
| Gender                                                   | Female            | 88 (58.7%)             | 194 (52.4%)            | 282 (54.2%)            | 0.20    |
|                                                          | Male              | 62 (41.3%)             | 176 (47.6%)            | 238 (45.8%)            |         |
| Race                                                     | White             | 147 (98.0%)            | 365 (98.6%)            | 512 (98.5%)            | 0.70    |
|                                                          | Non-White         | 3 (2.0%)               | 5 (1.4%)               | 8 (1.5%)               |         |
| Education                                                |                   | 1 (0.7%)               | 1 (0.3%)               | 2 (0.4%)               | <0.0001 |
|                                                          | 8th Gr or<br>Less | 36 (24.0%)             | 31 (8.4%)              | 67 (12.9%)             |         |
|                                                          | Grade 9-11        | 26 (17.3%)             | 25 (6.8%)              | 51 (9.8%)              |         |
|                                                          | HS Educ           | 48 (32.0%)             | 138 (37.3%)            | 186 (35.8%)            |         |
|                                                          | College Educ      | 39 (26.0%)             | 175 (47.3%)            | 214 (41.2%)            |         |
| Household Income                                         |                   | 2 (1.3%)               | 0 (0.0%)               | 2 (0.4%)               | <0.0001 |
|                                                          | <\$15K            | 54 (36.0%)             | 51 (13.8%)             | 105 (20.2%)            |         |
|                                                          | \$15K-<\$25K      | 37 (24.7%)             | 58 (15.7%)             | 95 (18.3%)             |         |
|                                                          | \$25K-<\$50K      | 24 (16.0%)             | 99 (26.8%)             | 123 (23.7%)            |         |

|                       |              |             |             |             |         |
|-----------------------|--------------|-------------|-------------|-------------|---------|
|                       | \$50K-<\$75K | 5 (3.3%)    | 54 (14.6%)  | 59 (11.3%)  |         |
|                       | \$75K +      | 7 (4.7%)    | 56 (15.1%)  | 63 (12.1%)  |         |
|                       | RTA/DK       | 21 (14.0%)  | 52 (14.1%)  | 73 (14.0%)  |         |
| Smoker                | Current      | 77 (51.3%)  | 67 (18.1%)  | 144 (27.7%) | <0.0001 |
|                       | Former       | 67 (44.7%)  | 118 (31.9%) | 185 (35.6%) |         |
|                       | Never        | 6 (4.0%)    | 185 (50.0%) | 191 (36.7%) |         |
| Diabetes              | No           | 117 (78.0%) | 303 (81.9%) | 420 (80.8%) | 0.31    |
|                       | Yes          | 33 (22.0%)  | 67 (18.1%)  | 100 (19.2%) |         |
| COPD                  | No           | 83 (55.3%)  | 329 (88.9%) | 412 (79.2%) | <0.0001 |
|                       | Yes          | 65 (43.3%)  | 39 (10.5%)  | 104 (20.0%) |         |
|                       | D            | 2 (1.3%)    | 2 (0.5%)    | 4 (0.8%)    |         |
| Chronic Lung Disease  | No           | 56 (37.3%)  | 256 (69.2%) | 312 (60.0%) | <0.0001 |
|                       | Yes          | 94 (62.7%)  | 114 (30.8%) | 208 (40.0%) |         |
| Chronic Heart Disease | No           | 100 (66.7%) | 279 (75.4%) | 379 (72.9%) | 0.04    |
|                       | Yes          | 50 (33.3%)  | 91 (24.6%)  | 141 (27.1%) |         |

RTA= Refused to answer, DK = didn't know, pred = predicted, mos = months, vegs = vegetables, inc = including, c/day= cups (240 mL) per day, tsp = teaspoon (5 mL), bevs – beverages, gr = grade, educ = education, K = thousand, COPD = chronic obstructive pulmonary disease.
