# Supplementary material for: A case-control study of trace-element status and lung cancer in Appalachian Kentucky
Source: PubMed Central journal article supplement (PMC6392268; doi:10.1371/journal.pone.0212340), 2019-02-27
Supplement: pone.0212340.s002.pdf [file pone.0212340.s002.pdf]

**S2 Table. Full cohort demographics broken down by those who provided toenails (nails) versus those who didn't (no-nails).**

|                                                              |                   | <b>Nails</b>           | <b>No Nails</b>        | <b>All</b>             | <b>p-value</b> |
|--------------------------------------------------------------|-------------------|------------------------|------------------------|------------------------|----------------|
| N                                                            |                   | 367                    | 153                    | 520                    |                |
| Age                                                          |                   | 62.0 (26.0 - 91.0)     | 65.0 (38.0 - 87.0)     | 63.0 (26.0 - 91.0)     | 0.01           |
| BMI (3 mos ago)                                              |                   | 28.5 (14.6 - 66.6)     | 28.2 (15.1 - 47.3)     | 28.4 (14.6 - 66.6)     | 0.83           |
| Created:<br>Comorbidity Score                                |                   | 1.0 (0.0 - 11.0)       | 1.0 (0.0 - 11.0)       | 1.0 (0.0 - 11.0)       | 0.62           |
| Pred fruits/vegs incl<br>legumes & fries<br>c/day            |                   | 2.5 (1.6 - 4.2)        | 2.5 (1.6 - 4.2)        | 2.5 (1.6 - 4.2)        | 0.69           |
| Pred fruits/vegs incl<br>legumes & no fries<br>c/day         |                   | 2.4 (1.4 - 4.1)        | 2.4 (1.5 - 4.0)        | 2.4 (1.4 - 4.1)        | 0.62           |
| Pred fruits c/day                                            |                   | 0.8 (0.4 - 2.2)        | 0.9 (0.4 - 1.9)        | 0.9 (0.4 - 2.2)        | 1.00           |
| Pred vegetables incl<br>legumes & fries<br>c/day             |                   | 1.7 (1.1 - 2.7)        | 1.6 (1.2 - 3.1)        | 1.6 (1.1 - 3.1)        | 0.34           |
| Pred vegs incl<br>legumes & no fries<br>c/day                |                   | 1.5 (0.9 - 2.5)        | 1.5 (1.0 - 3.0)        | 1.5 (0.9 - 3.0)        | 0.21           |
| Pred dairy c/day                                             |                   | 1.5 (0.9 - 4.3)        | 1.5 (0.9 - 2.7)        | 1.5 (0.9 - 4.3)        | 0.16           |
| Pred total added<br>sugars tsp/day                           |                   | 14.9 (10.0 - 36.0)     | 15.4 (10.0 - 36.8)     | 15.1 (10.0 - 36.8)     | 0.11           |
| Pred added sugars<br>from sugar-<br>sweetened bevs<br>tsp/da |                   | 5.6 (3.6 - 21.9)       | 5.1 (3.6 - 20.9)       | 5.3 (3.6 - 21.9)       | 0.94           |
| Pred whole grains<br>oz/day                                  |                   | 0.8 (0.3 - 1.8)        | 0.7 (0.3 - 1.9)        | 0.8 (0.3 - 1.9)        | 0.26           |
| Pred fiber gm/day                                            |                   | 16.4 (11.1 - 25.5)     | 17.2 (10.0 - 28.5)     | 16.6 (10.0 - 28.5)     | 0.15           |
| Pred calcium<br>mg/day                                       |                   | 906.6 (632.2 - 1797.5) | 948.0 (615.8 - 1477.5) | 921.3 (615.8 - 1797.5) | 0.01           |
| Case/Control                                                 | case              | 100 (27.2%)            | 50 (32.7%)             | 150 (28.8%)            | 0.21           |
|                                                              | control           | 267 (72.8%)            | 103 (67.3%)            | 370 (71.2%)            |                |
| Gender                                                       | Female            | 209 (56.9%)            | 73 (47.7%)             | 282 (54.2%)            | 0.05           |
|                                                              | Male              | 158 (43.1%)            | 80 (52.3%)             | 238 (45.8%)            |                |
| Race                                                         | White             | 360 (98.1%)            | 152 (99.3%)            | 512 (98.5%)            | 0.45           |
|                                                              | Non-White         | 7 (1.9%)               | 1 (0.7%)               | 8 (1.5%)               |                |
| Education                                                    | .                 | 1 (0.3%)               | 1 (0.7%)               | 2 (0.4%)               | 0.03           |
|                                                              | 8th Gr or<br>Less | 39 (10.6%)             | 28 (18.3%)             | 67 (12.9%)             |                |
|                                                              | Grade 9-11        | 36 (9.8%)              | 15 (9.8%)              | 51 (9.8%)              |                |
|                                                              | HS Educ           | 127 (34.6%)            | 59 (38.6%)             | 186 (35.8%)            |                |
|                                                              | College<br>Educ   | 164 (44.7%)            | 50 (32.7%)             | 214 (41.2%)            |                |
| Household Income                                             | .                 | 2 (0.5%)               | 0 (0.0%)               | 2 (0.4%)               | 0.0002         |
|                                                              | <\$15K            | 72 (19.6%)             | 33 (21.6%)             | 105 (20.2%)            |                |

|                       |                  |             |             |             |         |
|-----------------------|------------------|-------------|-------------|-------------|---------|
|                       | \$15K-<br><\$25K | 70 (19.1%)  | 25 (16.3%)  | 95 (18.3%)  |         |
|                       | \$25K-<br><\$50K | 91 (24.8%)  | 32 (20.9%)  | 123 (23.7%) |         |
|                       | \$50K-<br><\$75K | 46 (12.5%)  | 13 (8.5%)   | 59 (11.3%)  |         |
|                       | \$75K +          | 51 (13.9%)  | 12 (7.8%)   | 63 (12.1%)  |         |
|                       | RTA/DK           | 35 (9.5%)   | 38 (24.8%)  | 73 (14.0%)  |         |
|                       |                  | Nails       | No Nails    | All         | p-value |
| Smoker                | Current          | 102 (27.8%) | 42 (27.5%)  | 144 (27.7%) | 0.35    |
|                       | Former           | 124 (33.8%) | 61 (39.9%)  | 185 (35.6%) |         |
|                       | Never            | 141 (38.4%) | 50 (32.7%)  | 191 (36.7%) |         |
| Diabetes              | No               | 303 (82.6%) | 117 (76.5%) | 420 (80.8%) | 0.11    |
|                       | Yes              | 64 (17.4%)  | 36 (23.5%)  | 100 (19.2%) |         |
| COPD                  | No               | 288 (78.5%) | 124 (81.0%) | 412 (79.2%) | 0.41    |
|                       | Yes              | 77 (21.0%)  | 27 (17.6%)  | 104 (20.0%) |         |
|                       | D                | 2 (0.5%)    | 2 (1.3%)    | 4 (0.8%)    |         |
| Chronic Lung Disease  | No               | 214 (58.3%) | 98 (64.1%)  | 312 (60.0%) | 0.22    |
|                       | Yes              | 153 (41.7%) | 55 (35.9%)  | 208 (40.0%) |         |
| Chronic Heart Disease | No               | 273 (74.4%) | 106 (69.3%) | 379 (72.9%) | 0.23    |
|                       | Yes              | 94 (25.6%)  | 47 (30.7%)  | 141 (27.1%) |         |

RTA= Refused to answer, DK = didn't know, pred = predicted, mos = months, vgs = vegetables, inc = including, c/day= cups (240 mL) per day, tsp = teaspoon (5 mL), bevs – beverages, gr = grade, educ = education, K = thousand, COPD = chronic obstructive pulmonary disease. Numbers in parenthesis indicate the range of values for age and BMI and percentages for count data.
