# Supplementary material for: A case-control study of trace-element status and lung cancer in Appalachian Kentucky
Source: PubMed Central journal article supplement (PMC6392268; doi:10.1371/journal.pone.0212340), 2019-02-27
Supplement: pone.0212340.s003.pdf [file pone.0212340.s003.pdf]

**S3 Table. Number of individuals contacted versus recruited by gender and age for controls (top) and cases (bottom).**

**Control**

| Variable  | Total  |                         |                            | Male   |                         |                            | Female |                         |                            |
|-----------|--------|-------------------------|----------------------------|--------|-------------------------|----------------------------|--------|-------------------------|----------------------------|
|           | Sample | Yes for to be recruited | Yes recruited in the study | Sample | Yes for to be recruited | Yes recruited in the study | Sample | Yes for to be recruited | Yes recruited in the study |
|           | N      | N                       | N                          | N      | N                       | N                          | N      | N                       | N                          |
| Age Group |        |                         |                            |        |                         |                            |        |                         |                            |
| 18 - 34   | 55     | 8                       | 1                          | 20     | 3                       | 1                          | 35     | 5                       |                            |
| 35-49     | 2160   | 280                     | 9                          | 1087   | 143                     | 0                          | 1073   | 137                     | 9                          |
| 50-64     | 4373   | 845                     | 124                        | 2485   | 431                     | 62                         | 1888   | 414                     | 62                         |
| 65-74     | 2558   | 669                     | 138                        | 1291   | 323                     | 59                         | 1267   | 346                     | 79                         |
| 75-84     | 1435   | 271                     | 81                         | 667    | 116                     | 45                         | 768    | 155                     | 36                         |
| 85+       | 332    | 42                      | 17                         | 132    | 14                      | 9                          | 200    | 28                      | 8                          |
| NULL      | 2      | 0                       | 0                          | 1      | 0                       | 0                          | 0      | 0                       | 0                          |
|           | 10,915 | 2,115                   | 370                        | 5,683  | 1,030                   | 176                        | 5,231  | 1,085                   | 194                        |

370 total controls

**Case**

| Variable  | Total  |                         |                            | Male   |                         |                            | Female |                         |                            |
|-----------|--------|-------------------------|----------------------------|--------|-------------------------|----------------------------|--------|-------------------------|----------------------------|
|           | Sample | Yes for to be recruited | Yes recruited in the study | Sample | Yes for to be recruited | Yes recruited in the study | Sample | Yes for to be recruited | Yes recruited in the study |
|           | N      | N                       | N                          | N      | N                       | N                          | N      | N                       | N                          |
| Age Group |        |                         |                            |        |                         |                            |        |                         |                            |
| 18 - 34   | 43     | 0                       | 0                          | 16     | 0                       | 0                          | 27     | 0                       | 0                          |
| 35-49     | 248    | 26                      | 6                          | 90     | 12                      | 2                          | 158    | 14                      | 4                          |
| 50-64     | 1048   | 277                     | 54                         | 549    | 116                     | 21                         | 499    | 161                     | 33                         |
| 65-74     | 911    | 213                     | 56                         | 480    | 109                     | 24                         | 431    | 104                     | 32                         |
| 75-84     | 435    | 133                     | 27                         | 254    | 70                      | 10                         | 181    | 63                      | 17                         |
| 85+       | 69     | 116                     | 7                          | 36     | 6                       | 5                          | 33     | 7                       | 2                          |
| NULL      | 22     | 5                       | 0                          | 13     | 3                       | 0                          | 9      | 2                       | 0                          |
| Stage     |        |                         |                            |        |                         |                            |        |                         |                            |
| Stage I   |        |                         |                            |        |                         |                            |        |                         |                            |
| Stage II  |        |                         |                            |        |                         |                            |        |                         |                            |
| Stage III |        |                         |                            |        |                         |                            |        |                         |                            |
| Stage IV  | 2,776  | 770                     | 150                        | 1,438  | 316                     | 62                         | 1,338  | 351                     | 88                         |

150 total cases
