# Supplementary material for: A case-control study of trace-element status and lung cancer in Appalachian Kentucky
Source: PubMed Central journal article supplement (PMC6392268; doi:10.1371/journal.pone.0212340), 2019-02-27
Supplement: pone.0212340.s004.pdf [file pone.0212340.s004.pdf]

**S4 Table. Recovery of trace elements from National Institute of Environmental Sciences (Japan) certified reference material number 13 (Human Hair).**

|           | <b>Measured<br/>(CRM 13)</b> | <b>Certified<br/>(CRM 13)</b> |
|-----------|------------------------------|-------------------------------|
| <b>Al</b> | 58.8 (12.7)                  | 120*                          |
| <b>Cr</b> | 1.27 (0.45)                  | NA                            |
| <b>Mn</b> | 2.89 (0.35)                  | 3.9*                          |
| <b>Fe</b> | 99.7 (17.5)                  | 140*                          |
| <b>Co</b> | 0.073 (0.015)                | 0.07*                         |
| <b>Ni</b> | 1.69 (0.36)                  | NA                            |
| <b>Cu</b> | 15.4 (1.19)                  | 15.3 (1.3)                    |
| <b>Zn</b> | 157.9 (10.7)                 | 172 (11)                      |
| <b>As</b> | 0.094 (0.016)                | 0.10*                         |
| <b>Se</b> | 1.73 (0.12)                  | 1.79 (0.17)                   |
| <b>Cd</b> | 0.204 (0.017)                | 0.23 (0.03)                   |
| <b>Pb</b> | 4.78 (0.61)                  | 4.6 (0.4)                     |
| <b>U</b>  | BDL                          | NA                            |

Values (  $\mu\text{g/g}$  dry mass) are means followed by standard deviation or uncertainty in parenthesis for measured and certified or reference values, respectively. Asterisks indicate that the value is a reference value with no uncertainty estimate.
