# Supplementary material for: A case-control study of trace-element status and lung cancer in Appalachian Kentucky
Source: PubMed Central journal article supplement (PMC6392268; doi:10.1371/journal.pone.0212340), 2019-02-27
Supplement: pone.0212340.s005.pdf [file pone.0212340.s005.pdf]

**S5 Table – Quintiles of trace-element concentrations in toenails ( $\mu\text{g/g}$  dry mass) broken down by case versus control, age and smoking status.**

|           |             | Case/Control |         | Age  |         |      |         | Smoking Status |         |        |         |       |         |
|-----------|-------------|--------------|---------|------|---------|------|---------|----------------|---------|--------|---------|-------|---------|
|           |             |              |         | <63  |         | 63+  |         | Current        |         | Former |         | Never |         |
|           |             | case         | control | case | control | case | control | case           | control | case   | control | case  | control |
| <b>As</b> | <b>10th</b> | 0.01         | 0.01    | 0.02 | 0.02    | 0.01 | 0.01    | 0.02           | 0.02    | 0.01   | 0.01    | 0.01  | 0.01    |
|           | <b>25th</b> | 0.03         | 0.02    | 0.03 | 0.03    | 0.03 | 0.02    | 0.03           | 0.03    | 0.03   | 0.02    | 0.01  | 0.02    |
|           | <b>50th</b> | 0.04         | 0.04    | 0.05 | 0.05    | 0.03 | 0.04    | 0.05           | 0.05    | 0.04   | 0.04    | 0.04  | 0.04    |
|           | <b>75th</b> | 0.06         | 0.07    | 0.09 | 0.08    | 0.05 | 0.06    | 0.07           | 0.10    | 0.06   | 0.06    | 0.04  | 0.07    |
|           | <b>90th</b> | 0.13         | 0.12    | 0.14 | 0.13    | 0.10 | 0.10    | 0.15           | 0.13    | 0.11   | 0.10    | 0.04  | 0.11    |
| <b>Cr</b> | <b>10th</b> | 0.22         | 0.35    | 0.29 | 0.34    | 0.15 | 0.37    | 0.21           | 0.23    | 0.24   | 0.42    | 0.68  | 0.34    |
|           | <b>25th</b> | 0.51         | 0.71    | 0.54 | 0.73    | 0.45 | 0.68    | 0.45           | 0.65    | 0.54   | 0.71    | 0.68  | 0.74    |
|           | <b>50th</b> | 0.93         | 1.17    | 0.92 | 1.13    | 0.98 | 1.21    | 0.77           | 0.95    | 1.04   | 1.12    | 1.02  | 1.37    |
|           | <b>75th</b> | 1.60         | 2.28    | 1.23 | 1.91    | 1.72 | 2.69    | 1.25           | 1.65    | 1.72   | 2.14    | 1.29  | 2.62    |
|           | <b>90th</b> | 2.29         | 3.80    | 2.21 | 3.05    | 2.38 | 3.85    | 2.23           | 2.06    | 2.50   | 3.35    | 1.29  | 4.39    |
| <b>Ni</b> | <b>10th</b> | 0.16         | 0.11    | 0.27 | 0.12    | 0.07 | 0.11    | 0.23           | 0.11    | 0.10   | 0.14    | 0.43  | 0.08    |
|           | <b>25th</b> | 0.38         | 0.43    | 0.40 | 0.42    | 0.36 | 0.45    | 0.39           | 0.38    | 0.36   | 0.42    | 0.43  | 0.52    |
|           | <b>50th</b> | 0.70         | 0.89    | 0.69 | 0.79    | 0.71 | 0.96    | 0.57           | 0.62    | 0.77   | 0.95    | 0.82  | 1.03    |
|           | <b>75th</b> | 1.19         | 1.78    | 1.23 | 1.63    | 1.18 | 1.83    | 1.23           | 1.07    | 1.21   | 1.82    | 1.16  | 1.87    |
|           | <b>90th</b> | 2.37         | 3.01    | 2.47 | 2.48    | 2.03 | 3.43    | 1.89           | 1.84    | 3.90   | 3.01    | 1.16  | 3.43    |
| <b>Cd</b> | <b>10th</b> | 0.00         | 0.01    | 0.00 | 0.01    | 0.00 | 0.01    | 0.00           | 0.01    | 0.00   | 0.00    | 0.00  | 0.01    |
|           | <b>25th</b> | 0.01         | 0.01    | 0.00 | 0.01    | 0.01 | 0.01    | 0.01           | 0.01    | 0.01   | 0.01    | 0.00  | 0.02    |
|           | <b>50th</b> | 0.02         | 0.02    | 0.02 | 0.02    | 0.02 | 0.03    | 0.02           | 0.02    | 0.02   | 0.02    | 0.02  | 0.03    |
|           | <b>75th</b> | 0.05         | 0.07    | 0.04 | 0.07    | 0.07 | 0.07    | 0.05           | 0.05    | 0.06   | 0.07    | 0.03  | 0.08    |
|           | <b>90th</b> | 0.61         | 0.52    | 0.43 | 0.35    | 0.69 | 0.53    | 0.54           | 0.14    | 0.69   | 0.54    | 0.03  | 0.52    |
| <b>Pb</b> | <b>10th</b> | 0.01         | 0.01    | 0.01 | 0.01    | 0.00 | 0.01    | 0.01           | 0.02    | 0.01   | 0.01    | 0.00  | 0.01    |
|           | <b>25th</b> | 0.02         | 0.02    | 0.02 | 0.02    | 0.01 | 0.02    | 0.02           | 0.03    | 0.01   | 0.02    | 0.00  | 0.01    |
|           | <b>50th</b> | 0.04         | 0.04    | 0.05 | 0.04    | 0.03 | 0.04    | 0.04           | 0.07    | 0.03   | 0.05    | 0.01  | 0.03    |
|           | <b>75th</b> | 0.08         | 0.09    | 0.10 | 0.09    | 0.08 | 0.09    | 0.07           | 0.14    | 0.12   | 0.10    | 0.08  | 0.07    |
|           | <b>90th</b> | 0.20         | 0.18    | 0.16 | 0.15    | 0.32 | 0.23    | 0.15           | 0.19    | 0.32   | 0.22    | 0.08  | 0.16    |

|           |             | Case/Control |         | Age    |         |        |         | Smoking Status |         |        |         |        |         |
|-----------|-------------|--------------|---------|--------|---------|--------|---------|----------------|---------|--------|---------|--------|---------|
|           |             |              |         | <63    |         | 63+    |         | Current        |         | Former |         | Never  |         |
|           |             | case         | control | case   | control | case   | control | case           | control | case   | control | case   | control |
| <b>Zi</b> | <b>10th</b> | 80.29        | 84.19   | 87.64  | 84.88   | 79.28  | 83.77   | 82.12          | 82.49   | 77.56  | 83.77   | 87.86  | 85.23   |
|           | <b>25th</b> | 96.91        | 92.90   | 99.42  | 93.76   | 95.10  | 92.61   | 98.60          | 93.76   | 96.50  | 91.95   | 87.86  | 93.43   |
|           | <b>50th</b> | 116.92       | 109.18  | 117.92 | 108.49  | 115.93 | 110.73  | 117.92         | 108.59  | 116.93 | 109.29  | 89.35  | 109.23  |
|           | <b>75th</b> | 139.33       | 130.41  | 142.92 | 129.80  | 130.79 | 130.56  | 140.03         | 122.37  | 138.75 | 132.65  | 144.55 | 130.43  |
|           | <b>90th</b> | 162.76       | 147.09  | 163.66 | 144.48  | 160.25 | 147.94  | 162.91         | 144.48  | 160.25 | 149.14  | 144.55 | 146.77  |
| <b>U</b>  | <b>10th</b> | 0.00         | 0.00    | 0.00   | 0.00    | 0.00   | 0.00    | 0.00           | 0.00    | 0.00   | 0.00    | 0.00   | 0.00    |
|           | <b>25th</b> | 0.00         | 0.00    | 0.00   | 0.00    | 0.00   | 0.00    | 0.00           | 0.00    | 0.00   | 0.00    | 0.00   | 0.00    |
|           | <b>50th</b> | 0.00         | 0.00    | 0.00   | 0.00    | 0.00   | 0.00    | 0.00           | 0.00    | 0.00   | 0.00    | 0.00   | 0.00    |
|           | <b>75th</b> | 0.01         | 0.01    | 0.01   | 0.01    | 0.01   | 0.01    | 0.00           | 0.00    | 0.01   | 0.01    | 0.01   | 0.01    |
|           | <b>90th</b> | 0.01         | 0.01    | 0.01   | 0.01    | 0.01   | 0.01    | 0.01           | 0.01    | 0.02   | 0.01    | 0.01   | 0.01    |
| <b>Fe</b> | <b>10th</b> | 6.32         | 6.52    | 9.01   | 6.99    | 5.85   | 5.71    | 7.71           | 8.06    | 5.85   | 6.41    | 8.14   | 6.30    |
|           | <b>25th</b> | 9.43         | 8.65    | 9.89   | 9.21    | 8.14   | 7.84    | 9.67           | 11.13   | 9.19   | 8.01    | 8.14   | 8.12    |
|           | <b>50th</b> | 11.79        | 12.03   | 12.76  | 12.21   | 11.27  | 11.73   | 11.67          | 13.32   | 11.35  | 12.03   | 39.15  | 10.86   |
|           | <b>75th</b> | 15.68        | 17.12   | 18.77  | 16.73   | 14.03  | 17.43   | 15.04          | 21.51   | 15.22  | 17.74   | 39.30  | 15.93   |
|           | <b>90th</b> | 29.13        | 26.82   | 30.67  | 26.74   | 26.58  | 27.91   | 22.34          | 34.72   | 30.78  | 29.34   | 39.30  | 23.31   |
| <b>Al</b> | <b>10th</b> | 2.83         | 3.68    | 3.25   | 4.14    | 2.05   | 3.58    | 3.10           | 3.58    | 2.83   | 4.03    | 2.05   | 3.33    |
|           | <b>25th</b> | 4.16         | 5.17    | 5.20   | 5.62    | 3.35   | 4.60    | 4.09           | 5.31    | 4.44   | 4.78    | 2.05   | 5.35    |
|           | <b>50th</b> | 6.38         | 7.30    | 7.64   | 8.09    | 5.82   | 6.41    | 6.44           | 7.95    | 6.24   | 7.45    | 7.96   | 7.23    |
|           | <b>75th</b> | 9.14         | 11.40   | 10.12  | 11.85   | 7.46   | 11.12   | 8.64           | 12.04   | 10.12  | 12.87   | 9.54   | 10.18   |
|           | <b>90th</b> | 13.77        | 18.67   | 16.00  | 22.97   | 11.32  | 14.98   | 11.32          | 18.67   | 16.62  | 24.02   | 9.54   | 15.27   |
| <b>Mn</b> | <b>10th</b> | 0.10         | 0.13    | 0.11   | 0.13    | 0.09   | 0.11    | 0.11           | 0.13    | 0.09   | 0.12    | 0.11   | 0.13    |
|           | <b>25th</b> | 0.16         | 0.20    | 0.23   | 0.21    | 0.13   | 0.18    | 0.18           | 0.19    | 0.14   | 0.23    | 0.11   | 0.20    |
|           | <b>50th</b> | 0.27         | 0.32    | 0.31   | 0.31    | 0.24   | 0.33    | 0.28           | 0.31    | 0.27   | 0.34    | 0.32   | 0.31    |
|           | <b>75th</b> | 0.41         | 0.51    | 0.44   | 0.49    | 0.34   | 0.51    | 0.44           | 0.52    | 0.37   | 0.54    | 0.40   | 0.48    |
|           | <b>90th</b> | 0.63         | 0.92    | 0.67   | 1.01    | 0.51   | 0.86    | 0.54           | 0.93    | 0.73   | 1.01    | 0.40   | 0.76    |
| <b>Co</b> | <b>10th</b> | 0.01         | 0.01    | 0.01   | 0.01    | 0.01   | 0.01    | 0.01           | 0.01    | 0.01   | 0.01    | 0.00   | 0.01    |
|           | <b>25th</b> | 0.01         | 0.01    | 0.01   | 0.01    | 0.01   | 0.01    | 0.01           | 0.01    | 0.01   | 0.01    | 0.00   | 0.01    |
|           | <b>50th</b> | 0.02         | 0.02    | 0.02   | 0.02    | 0.02   | 0.02    | 0.01           | 0.02    | 0.02   | 0.02    | 0.01   | 0.02    |
|           | <b>75th</b> | 0.02         | 0.03    | 0.02   | 0.03    | 0.02   | 0.04    | 0.02           | 0.03    | 0.03   | 0.03    | 0.02   | 0.03    |
|           | <b>90th</b> | 0.05         | 0.05    | 0.04   | 0.05    | 0.05   | 0.05    | 0.03           | 0.04    | 0.06   | 0.05    | 0.02   | 0.05    |

|           |             | Case/Control |         | Age  |         |      |         | Smoking Status |         |        |         |       |         |
|-----------|-------------|--------------|---------|------|---------|------|---------|----------------|---------|--------|---------|-------|---------|
|           |             |              |         | <63  |         | 63+  |         | Current        |         | Former |         | Never |         |
|           |             | case         | control | case | control | case | control | case           | control | case   | control | case  | control |
| <b>Cu</b> | <b>10th</b> | 2.13         | 2.24    | 2.18 | 2.37    | 2.01 | 2.00    | 2.18           | 1.92    | 2.01   | 2.06    | 2.63  | 2.29    |
|           | <b>25th</b> | 2.57         | 2.72    | 2.61 | 2.84    | 2.55 | 2.61    | 2.58           | 2.46    | 2.49   | 2.67    | 2.63  | 2.81    |
|           | <b>50th</b> | 3.09         | 3.25    | 3.11 | 3.46    | 3.02 | 3.08    | 3.01           | 3.09    | 3.16   | 3.38    | 3.02  | 3.25    |
|           | <b>75th</b> | 4.00         | 4.11    | 4.02 | 4.20    | 3.98 | 4.00    | 3.75           | 3.93    | 4.12   | 4.15    | 4.63  | 4.12    |
|           | <b>90th</b> | 5.01         | 5.06    | 4.83 | 5.40    | 5.08 | 4.75    | 4.74           | 6.00    | 5.24   | 5.18    | 4.63  | 5.01    |
| <b>Se</b> | <b>10th</b> | 0.67         | 0.74    | 0.68 | 0.74    | 0.67 | 0.73    | 0.68           | 0.69    | 0.67   | 0.74    | 0.94  | 0.75    |
|           | <b>25th</b> | 0.74         | 0.84    | 0.72 | 0.85    | 0.76 | 0.83    | 0.74           | 0.78    | 0.74   | 0.85    | 0.94  | 0.85    |
|           | <b>50th</b> | 0.90         | 0.94    | 0.86 | 0.93    | 0.91 | 0.95    | 0.87           | 0.86    | 0.90   | 0.97    | 1.06  | 0.97    |
|           | <b>75th</b> | 1.05         | 1.08    | 1.03 | 1.05    | 1.05 | 1.08    | 1.02           | 0.97    | 1.05   | 1.08    | 1.40  | 1.10    |
|           | <b>90th</b> | 1.17         | 1.26    | 1.18 | 1.22    | 1.16 | 1.27    | 1.19           | 1.06    | 1.16   | 1.25    | 1.40  | 1.28    |
