# Supplementary material for: A case-control study of trace-element status and lung cancer in Appalachian Kentucky
Source: PubMed Central journal article supplement (PMC6392268; doi:10.1371/journal.pone.0212340), 2019-02-27
Supplement: pone.0212340.s006.pdf [file pone.0212340.s006.pdf]

**S6 Table. Quintiles of drinking water trace element concentrations and method detection limits ( $\mu\text{g/L}$ ).**

| Median Det Limit |       |      | Case/Control |         | Age    |         |        |         | Smoking Status |         |        |         |        |         |
|------------------|-------|------|--------------|---------|--------|---------|--------|---------|----------------|---------|--------|---------|--------|---------|
|                  |       |      |              |         | <63    |         | 63+    |         | Current        |         | Former |         | Never  |         |
|                  |       |      | case         | control | case   | control | case   | control | case           | control | case   | control | case   | control |
| As               | 0.023 | N    | 148          | 367     | 73     | 174     | 75     | 193     | 75             | 66      | 67     | 117     | 6      | 184     |
|                  |       | 50th | 0.21         | 0.28    | 0.21   | 0.27    | 0.22   | 0.28    | 0.21           | 0.30    | 0.23   | 0.28    | 0.25   | 0.27    |
|                  |       | 90th | 0.52         | 0.54    | 0.62   | 0.54    | 0.48   | 0.55    | 0.61           | 0.57    | 0.48   | 0.65    | 0.54   | 0.52    |
| Cr               | 0.044 | N    | 148          | 367     | 73     | 174     | 75     | 193     | 75             | 66      | 67     | 117     | 6      | 184     |
|                  |       | 50th | 0.08         | 0.05    | 0.08   | 0.03    | 0.08   | 0.06    | 0.08           | 0.03    | 0.08   | 0.07    | 0.08   | 0.03    |
|                  |       | 90th | 0.23         | 0.23    | 0.23   | 0.23    | 0.23   | 0.23    | 0.19           | 0.32    | 0.27   | 0.21    | 0.54   | 0.23    |
| Ni               | 0.052 | N    | 148          | 367     | 73     | 174     | 75     | 193     | 75             | 66      | 67     | 117     | 6      | 184     |
|                  |       | 50th | 1.37         | 1.22    | 1.30   | 1.24    | 1.54   | 1.18    | 1.33           | 1.15    | 1.41   | 1.18    | 1.37   | 1.25    |
|                  |       | 90th | 3.59         | 3.71    | 3.66   | 3.36    | 2.99   | 3.76    | 4.11           | 3.01    | 2.88   | 3.85    | 4.29   | 3.76    |
| Cd               | 0.016 | N    | 148          | 367     | 73     | 174     | 75     | 193     | 75             | 66      | 67     | 117     | 6      | 184     |
|                  |       | 50th | 0.01         | 0.01    | 0.01   | 0.01    | 0.01   | 0.01    | 0.01           | 0.01    | 0.01   | 0.01    | 0.01   | 0.01    |
|                  |       | 90th | 0.04         | 0.03    | 0.05   | 0.02    | 0.03   | 0.03    | 0.03           | 0.02    | 0.05   | 0.03    | 0.11   | 0.03    |
| Pb               | 0.019 | N    | 148          | 367     | 73     | 174     | 75     | 193     | 75             | 66      | 67     | 117     | 6      | 184     |
|                  |       | 50th | 0.16         | 0.18    | 0.15   | 0.16    | 0.16   | 0.18    | 0.15           | 0.17    | 0.16   | 0.15    | 1.14   | 0.19    |
|                  |       | 90th | 1.86         | 0.99    | 2.21   | 0.78    | 1.58   | 1.17    | 1.19           | 0.91    | 1.55   | 1.17    | 5.57   | 0.99    |
| Zi               | 0.324 | N    | 148          | 367     | 73     | 174     | 75     | 193     | 75             | 66      | 67     | 117     | 6      | 184     |
|                  |       | 50th | 20.74        | 16.34   | 17.43  | 14.84   | 22.24  | 16.72   | 23.92          | 16.71   | 17.78  | 13.24   | 17.03  | 17.64   |
|                  |       | 90th | 201.80       | 148.70  | 201.80 | 125.60  | 176.00 | 164.30  | 191.90         | 125.60  | 218.90 | 168.50  | 705.70 | 147.30  |
| U                | 0.016 | N    | 148          | 367     | 73     | 174     | 75     | 193     | 75             | 66      | 67     | 117     | 6      | 184     |
|                  |       | 50th | 0.02         | 0.02    | 0.02   | 0.02    | 0.02   | 0.02    | 0.02           | 0.02    | 0.03   | 0.02    | 0.05   | 0.02    |
|                  |       | 90th | 0.38         | 0.35    | 0.41   | 0.33    | 0.30   | 0.36    | 0.38           | 0.32    | 0.39   | 0.41    | 0.30   | 0.34    |
| Fe               | 0.097 | N    | 148          | 367     | 73     | 174     | 75     | 193     | 75             | 66      | 67     | 117     | 6      | 184     |
|                  |       | 50th | 8.71         | 6.59    | 8.93   | 6.03    | 7.73   | 7.57    | 10.25          | 6.36    | 5.98   | 6.40    | 15.36  | 7.16    |
|                  |       | 90th | 102.80       | 68.92   | 94.79  | 62.88   | 102.80 | 70.13   | 116.90         | 74.76   | 51.22  | 85.50   | 51.42  | 62.88   |
| Al               | 0.545 | N    | 148          | 367     | 73     | 174     | 75     | 193     | 75             | 66      | 67     | 117     | 6      | 184     |
|                  |       | 50th | 27.00        | 21.86   | 36.07  | 15.93   | 20.42  | 26.66   | 17.93          | 23.47   | 44.16  | 32.69   | 22.46  | 15.31   |
|                  |       | 90th | 153.90       | 142.30  | 170.00 | 119.70  | 122.40 | 153.80  | 112.40         | 163.80  | 186.90 | 169.20  | 110.10 | 119.70  |
| Mn               | 0.027 | N    | 148          | 367     | 73     | 174     | 75     | 193     | 75             | 66      | 67     | 117     | 6      | 184     |
|                  |       | 50th | 0.59         | 0.50    | 0.59   | 0.46    | 0.59   | 0.53    | 0.64           | 0.54    | 0.59   | 0.48    | 0.36   | 0.53    |
|                  |       | 90th | 11.28        | 5.59    | 5.24   | 4.61    | 11.28  | 5.81    | 27.67          | 19.23   | 3.28   | 5.40    | 3.79   | 4.52    |
| Co               | 0.018 | N    | 148          | 367     | 73     | 174     | 75     | 193     | 75             | 66      | 67     | 117     | 6      | 184     |
|                  |       | 50th | 0.08         | 0.07    | 0.08   | 0.06    | 0.08   | 0.07    | 0.07           | 0.07    | 0.08   | 0.07    | 0.10   | 0.07    |
|                  |       | 90th | 0.17         | 0.16    | 0.16   | 0.14    | 0.17   | 0.17    | 0.18           | 0.13    | 0.16   | 0.16    | 0.16   | 0.16    |
| Cu               | 0.070 | N    | 148          | 367     | 73     | 174     | 75     | 193     | 75             | 66      | 67     | 117     | 6      | 184     |
|                  |       | 50th | 8.61         | 11.95   | 7.23   | 13.88   | 10.53  | 11.55   | 10.42          | 7.25    | 6.30   | 11.50   | 62.18  | 14.47   |
|                  |       | 90th | 83.57        | 172.90  | 80.19  | 153.40  | 83.57  | 183.00  | 80.19          | 101.10  | 83.57  | 151.20  | 99.22  | 195.00  |

| Median Det Limit |       |      | Case/Control |         | Age  |         |      |         | Smoking Status |         |        |         |       |         |
|------------------|-------|------|--------------|---------|------|---------|------|---------|----------------|---------|--------|---------|-------|---------|
|                  |       |      |              |         | <63  |         | 63+  |         | Current        |         | Former |         | Never |         |
| Se               | 0.082 |      | case         | control | case | control | case | control | case           | control | case   | control | case  | control |
|                  |       | N    | 148          | 367     | 73   | 174     | 75   | 193     | 75             | 66      | 67     | 117     | 6     | 184     |
|                  |       | 50th | 0.13         | 0.15    | 0.15 | 0.16    | 0.13 | 0.15    | 0.08           | 0.14    | 0.16   | 0.15    | 0.21  | 0.15    |
|                  |       | 90th | 0.68         | 0.67    | 0.78 | 0.74    | 0.61 | 0.65    | 0.61           | 0.69    | 0.70   | 0.63    | 0.72  | 0.69    |
